# Supplementary material for: Conversion of Exogenous Cholesterol into Glycoalkaloids in Potato Shoots, Using Two Methods for Sterol Solubilisation
Source: PLOS journal article supplement (doi:10.1371/journal.pone.0082955), 2013-12-09

**Figure S4. Working model for the SGA biosynthesis from cholesterol.**

The reaction scheme is freely adapted from [16,20]. Occurrence of 26-hydroxycholesterol as an endogenous hydroxysterol in potato plants was demonstrated in the present study.

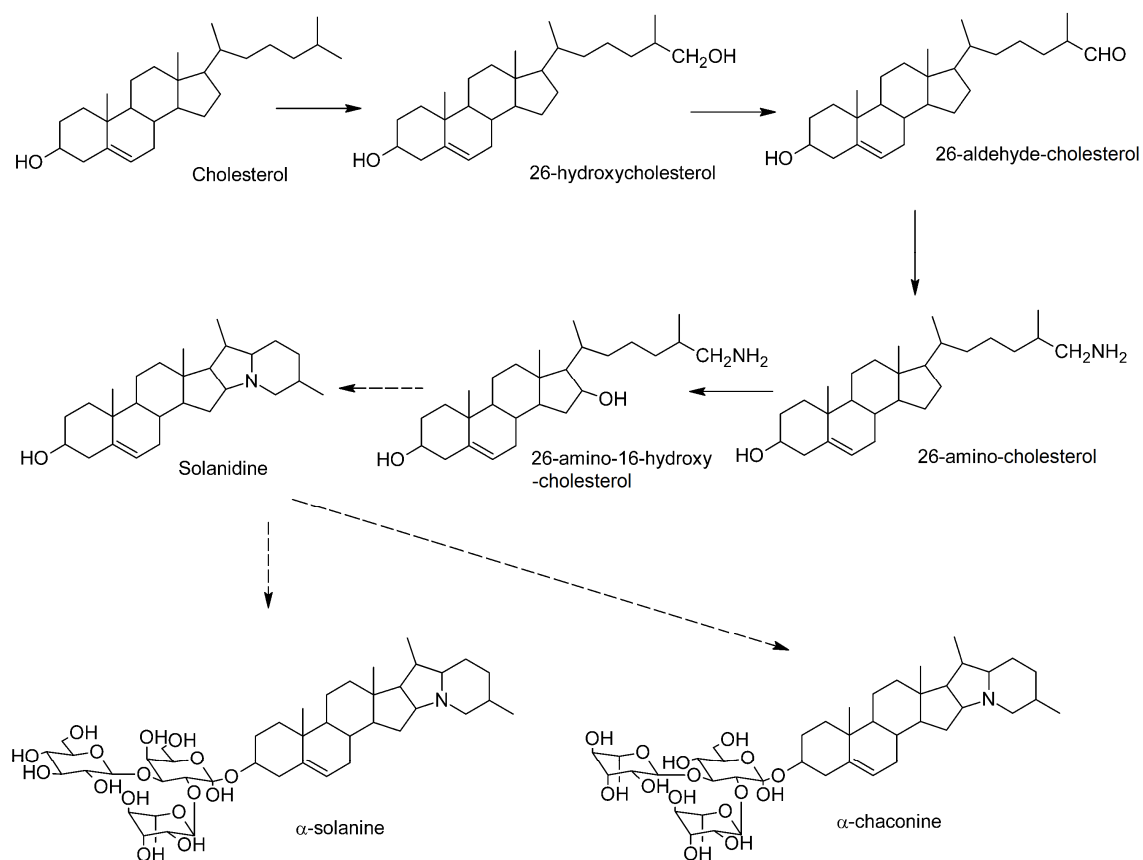

Supplement: S4 (10.1371/journal.pone.0082955.s004) [file journal.pone.0082955.s004]
